# Supplementary figures and images for: Methylphosphonate Degradation and Salt-Tolerance Genes of Two Novel Halophilic Marivita Metagenome-Assembled Genomes from Unrestored Solar Salterns
Source: MDPI journal article supplement (doi:10.3390/genes13010148), 2022-01-15

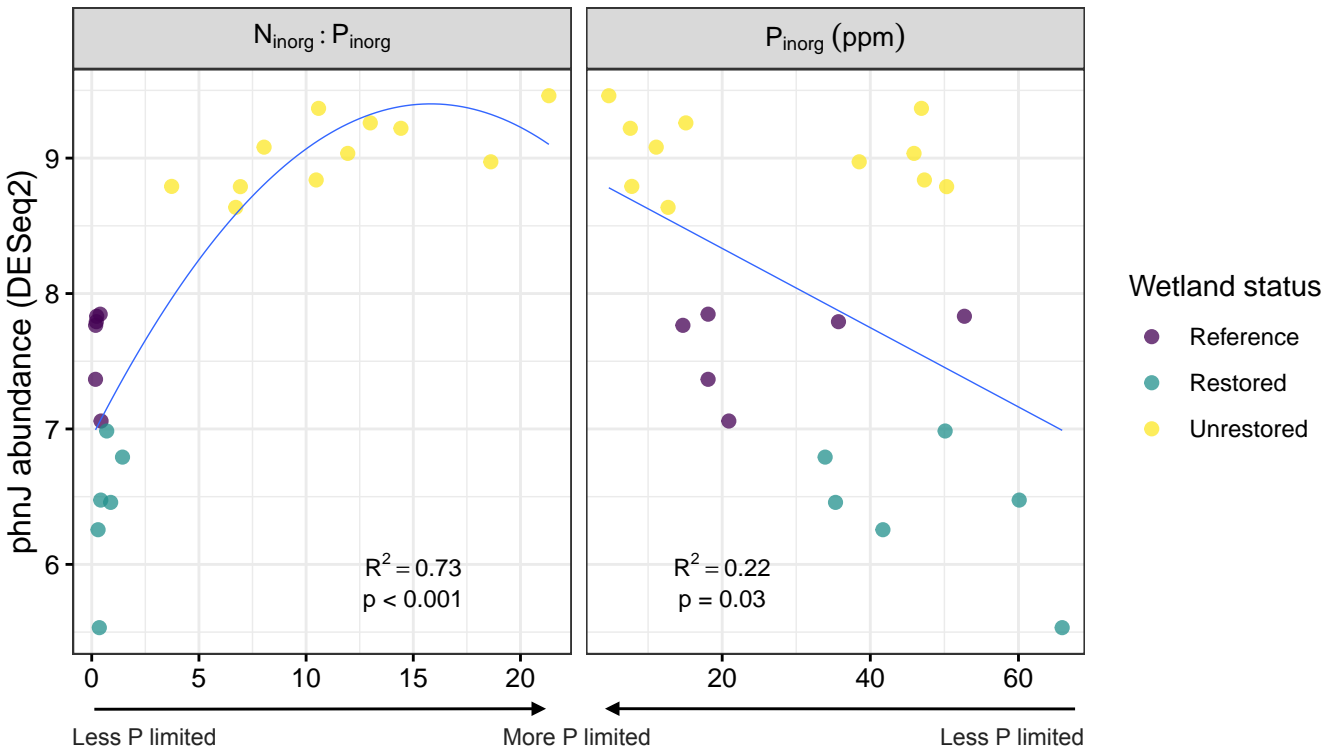

Supplement: s1 [file s1]

Reference genome

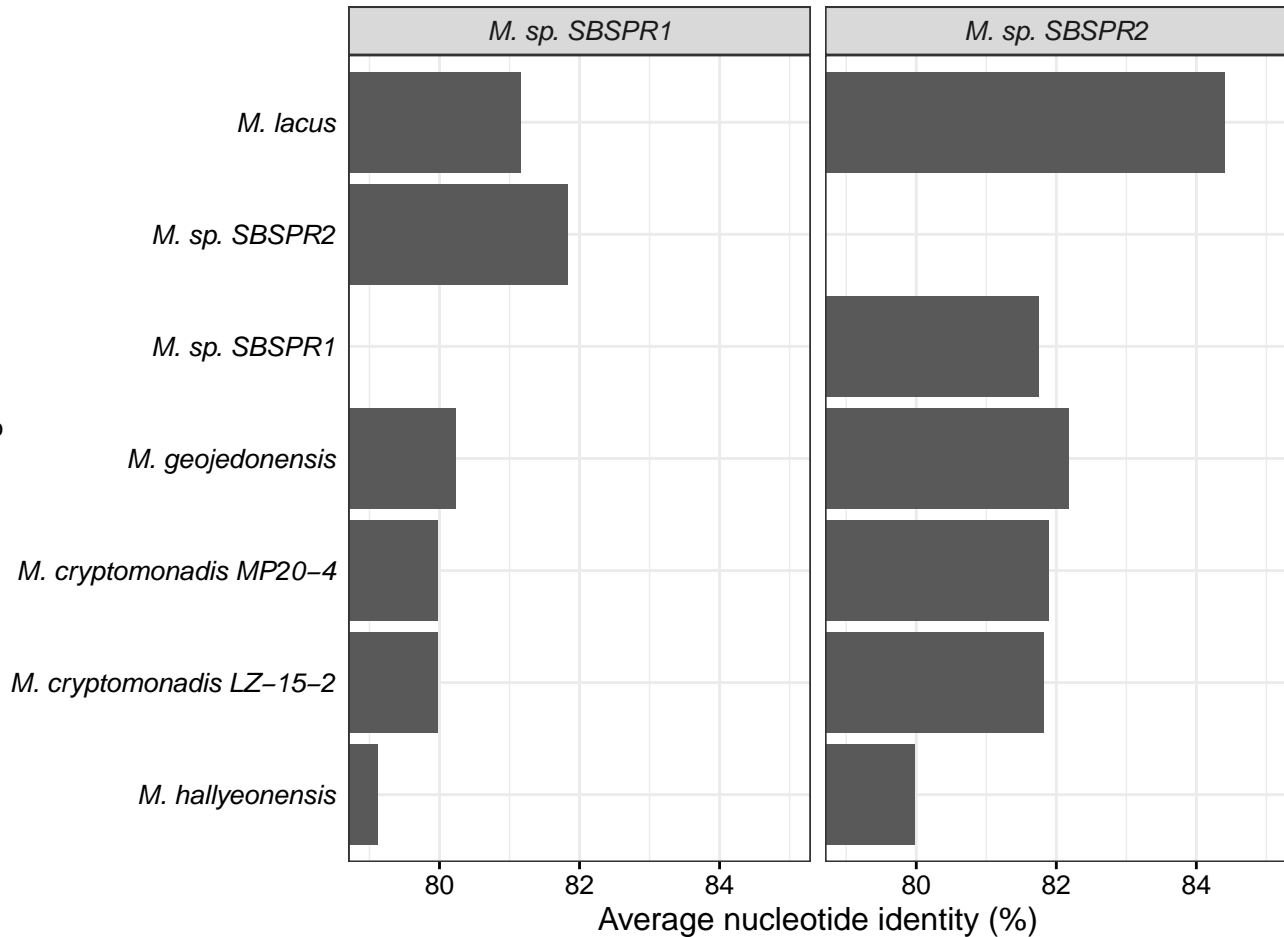

Supplement: s1 [file s1]

# MASH clustering

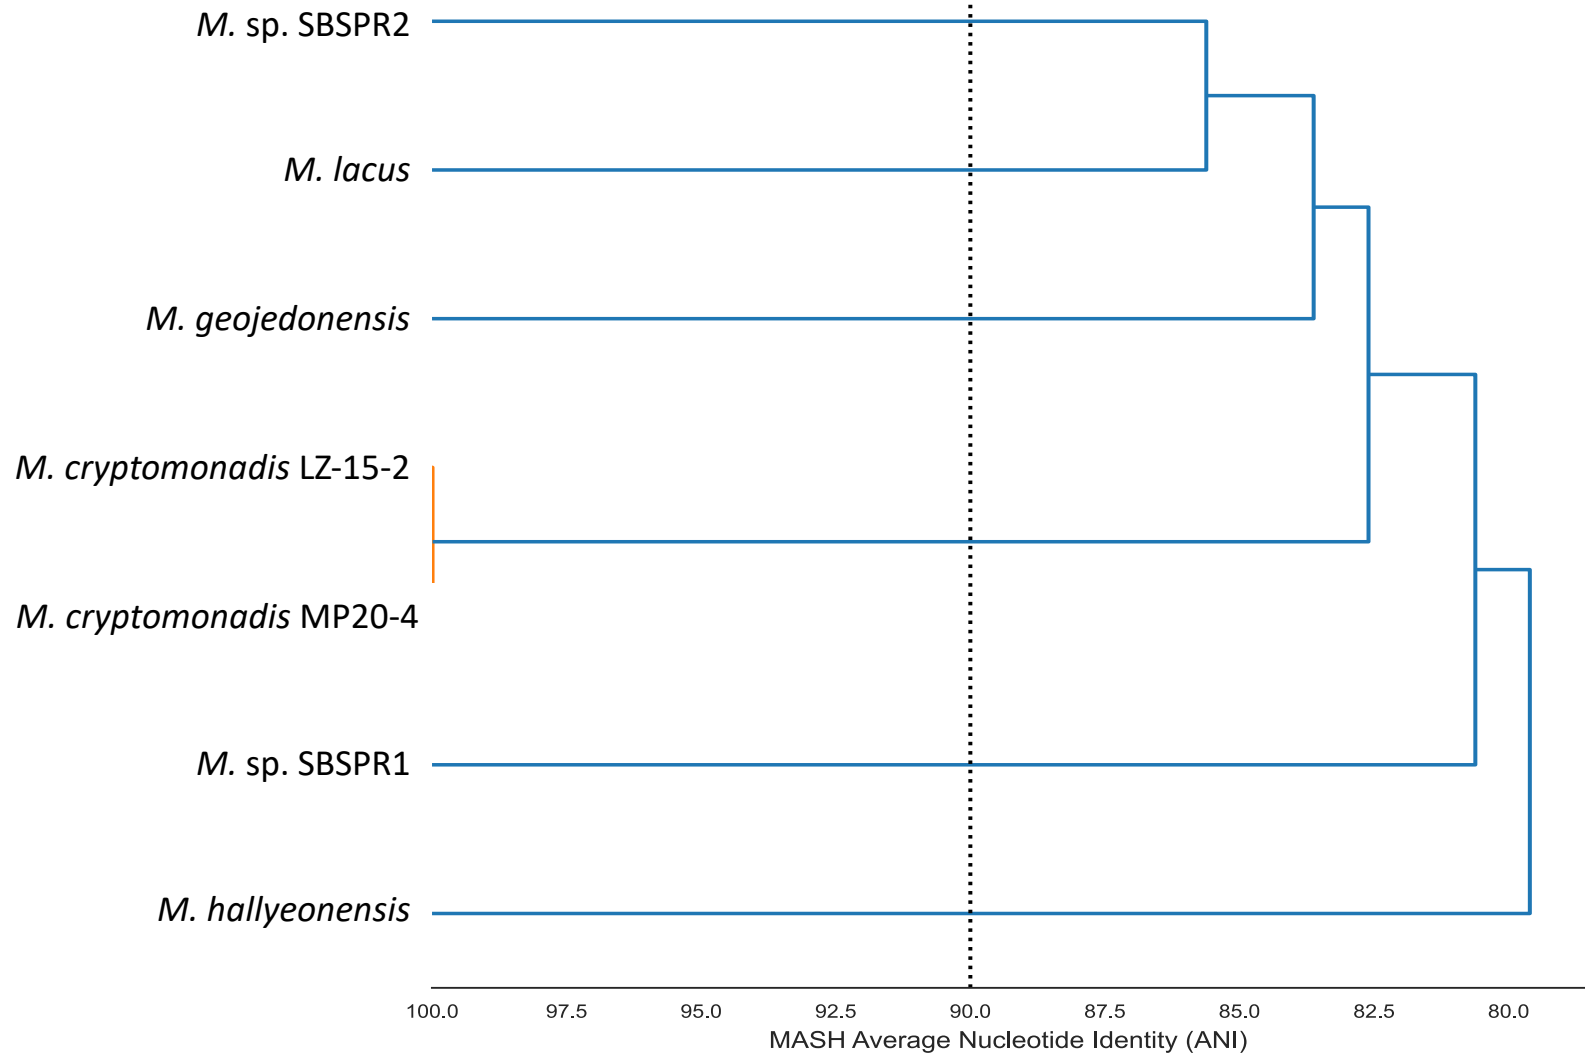

Supplement: s1 [file s1]

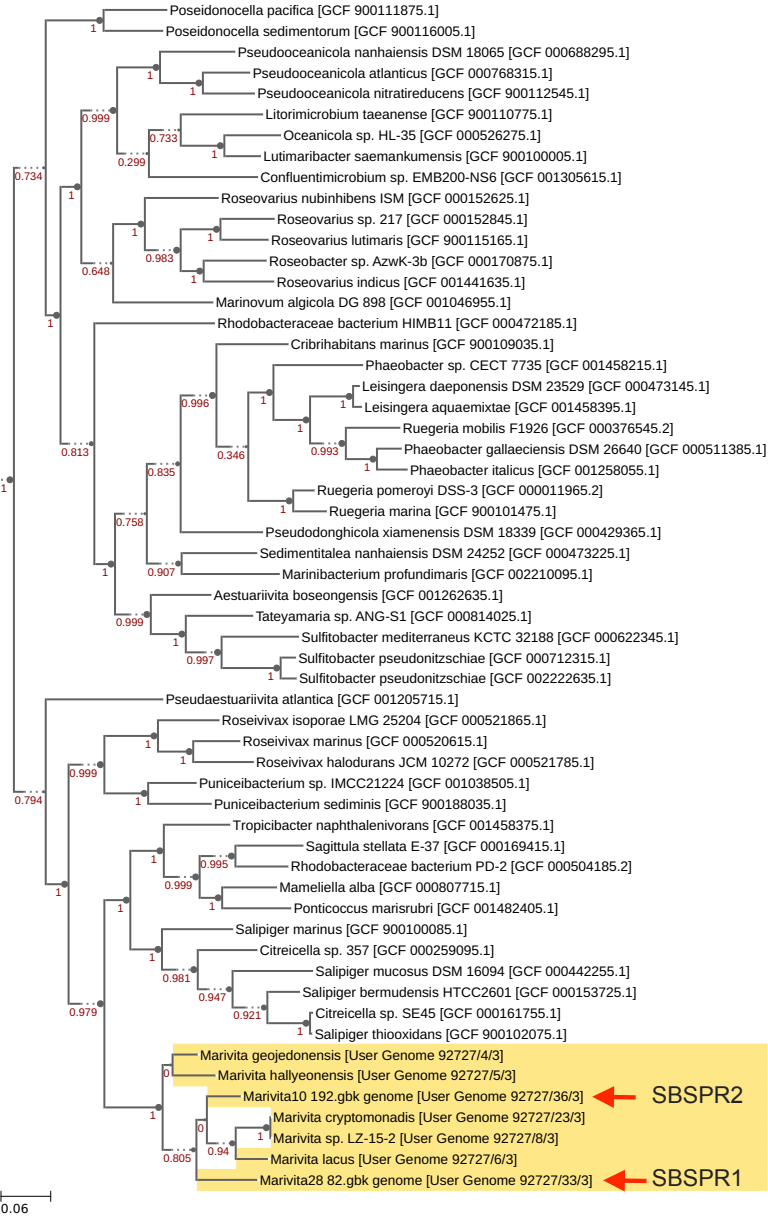

Supplement: s1 [file s1]

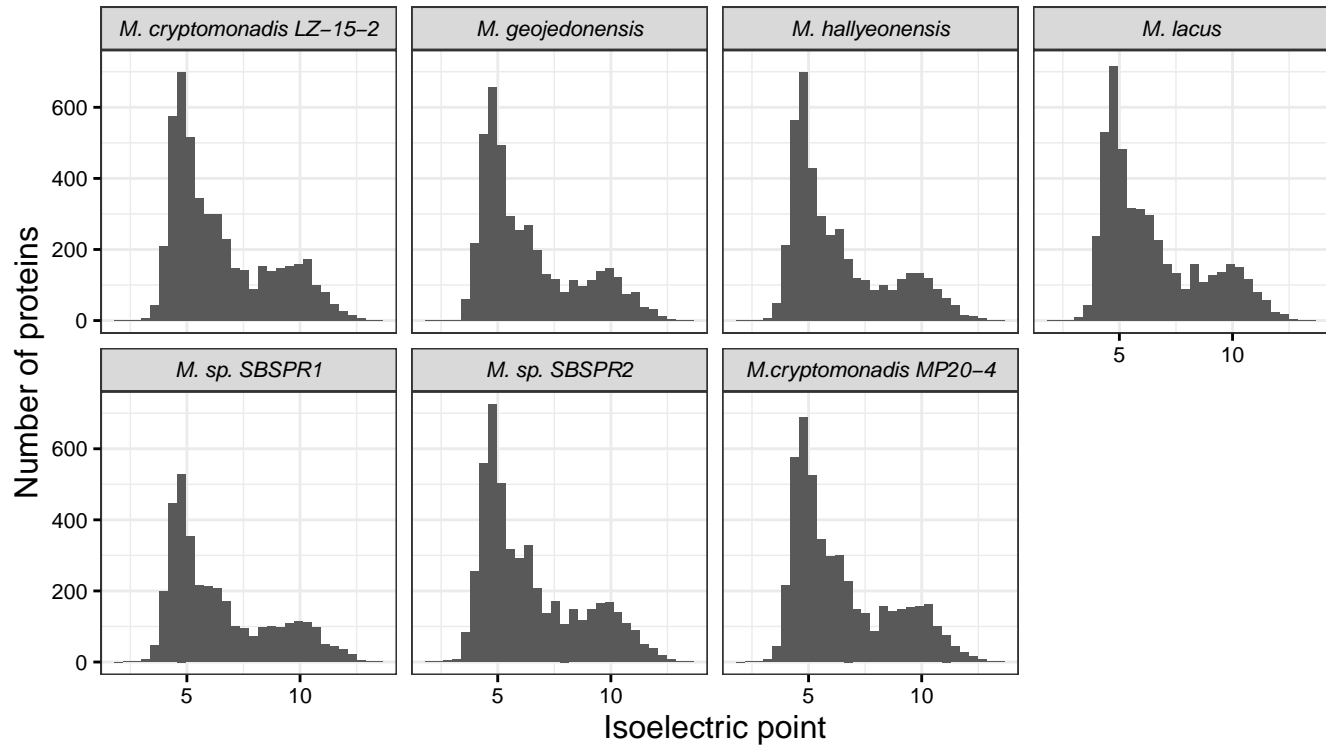

Supplement: s1 [file s1]
